# Supplementary material for: Influence of Citrus Scion/Rootstock Genotypes on Arbuscular Mycorrhizal Community Composition under Controlled Environment Condition
Source: MDPI journal article supplement (doi:10.3390/plants9070901), 2020-07-16

**Fig. S1 Configurations of six citrus scion/rootstock genotype combinations from the same field in a greenhouse.** *Poncirus/Poncirus* (*Poncirus* (*Poncirus trifoliata*) grafted onto *Poncirus*), *Citrangle/Citrangle* (*Citrangle* (*Citrus sinensis*×*Poncirus trifoliata*) grafted onto *Citrangle*), *Mandarin/Poncirus* (*Mandarin* (*Citrus reticulata*) grafted onto *Poncirus*), *Pummelo/Poncirus* (*HB pummelo* (*Citrus grandis*) grafted onto *Poncirus*), *Orange/Poncirus* (*Newhall sweet orange* (*Citrus sinensis*) grafted onto *Poncirus*), *Orange/Citrangle* (*Newhall sweet orange* grafted onto *Citrangle*).

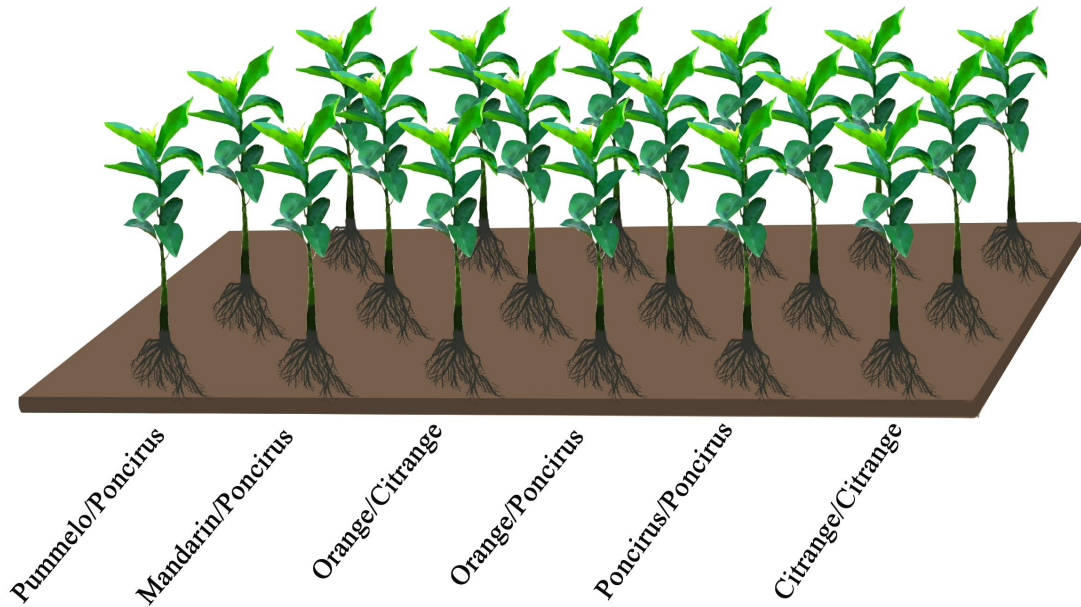

**Fig. S2 Rarefaction curve of Sobs Index of 18 root samples from 6 citrus scion/rootstock genotype combinations.**

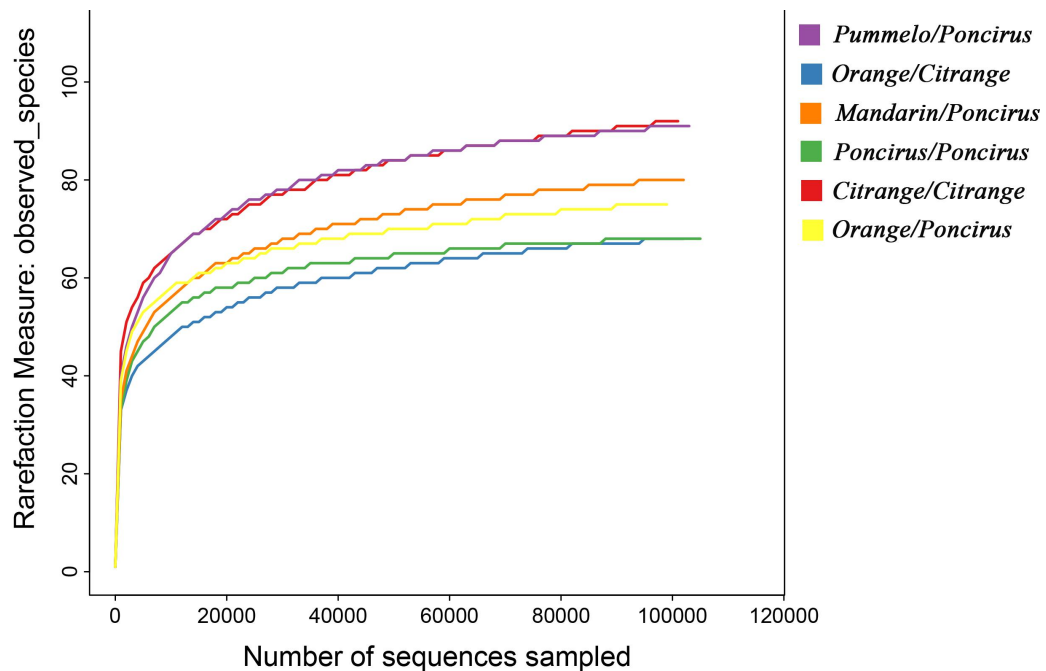

Supplement: s1 [file s1]
